# Supplementary material for: Efficient and thermally stable broadband near-infrared emission from near zero thermal expansion AlP3O9:Cr3+phosphors
Source: Royal Society of Chemistry journal article supplement (doi:10.1039/d2qi00046f), 2022-01-01
Supplement: d2qi00046f1.pdf [file d2qi00046f1.pdf]

## Supporting Information

### **Efficient and thermally stable broadband near-infrared emitting from near zero thermal expansion $\text{AlP}_3\text{O}_9:\text{Cr}^{3+}$ phosphor**

Decai Huang<sup>a,b</sup>, Xianguo He<sup>a,b</sup>, Jingrong Zhang<sup>a,b</sup>, Jie Hu<sup>a,b</sup>, Sisi Liang<sup>a,b</sup>, Dejian Chen<sup>a,b</sup>, Kunyuan Xu<sup>a,b</sup>, and Haomiao Zhu<sup>a,b,c,\*</sup>

<sup>a</sup> CAS Key Laboratory of Design and Assembly of Functional Nanostructures, Fujian Key Laboratory of Nanomaterials, Fujian Institute of Research on the Structure of Matter, Chinese Academy of Sciences, Fuzhou, Fujian, 350002, China.

<sup>b</sup> Xiamen Key Laboratory of Rare Earth Photoelectric Functional Materials, Xiamen Research Center of Rare Earth Materials, Haixi Institute, Chinese Academy of Sciences, Xiamen, Fujian, 361021, China.

<sup>c</sup> Ganjiang Innovation Academy, Chinese Academy of Sciences, Ganzhou, Jiangxi, 341000, China.

E-mail: zhm@fjirsm.ac.cn

**Supplementary Discussion:** The  $D_q$  parameter is obtained from the peak energy of the  ${}^4A_2 \rightarrow {}^4T_2$  transition, while Racah parameters  $B$  and  $C$  can be estimated by the following equations:<sup>1</sup>

$$E({}^4T_2 - {}^4A_2) = 10D_q \quad (1)$$

$$\frac{B}{D_q} = \frac{(\Delta E/D_q)^2 - 10(\Delta E/D_q)}{15(\Delta E/D_q - 8)} \quad (2)$$

$$3.05C = E({}^2E) - 7.9B + 1.8B^2/\Delta E \quad (3)$$

where  $\Delta E = [E({}^4T_1) - E({}^4T_2)]$  is the difference between the energies of the  ${}^4T_1$  and  ${}^4T_2$  states and  $E({}^2E)$  is the energy of the  ${}^2E$  state. The value of  ${}^4T_1$ ,  ${}^4T_2$  and  ${}^2E$  are estimated to be 20810, 14010 and 14780  $\text{cm}^{-1}$  from the excitation and emission bands, respectively. Based on equations (1) – (3), the values of  $B$ ,  $C$  and  $D_q/B$  were calculated to be 741  $\text{cm}^{-1}$ , 3157  $\text{cm}^{-1}$  and 1.89, respectively.

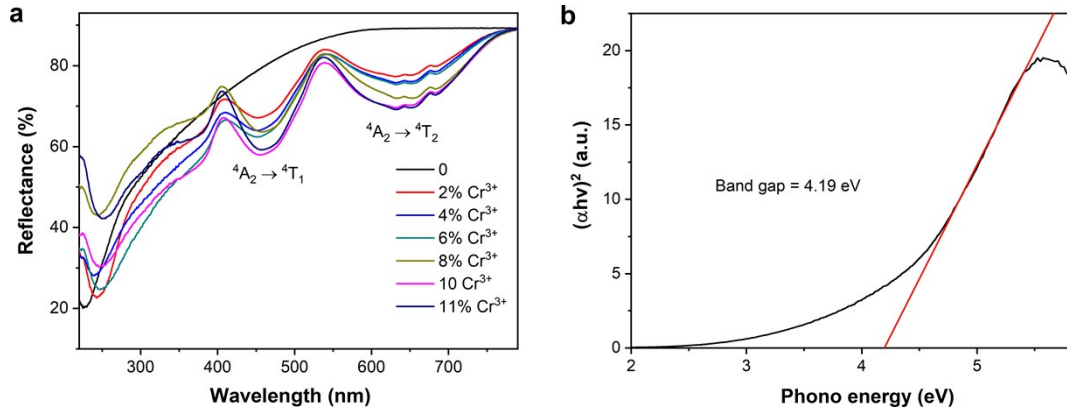

**Fig. S1.** (a) The diffuse reflectance spectra of the  $\text{AlP}_3\text{O}_9:\text{xCr}^{3+}$  ( $x = 0\text{--}11.0$  at.%) samples. (b) The band gap simulation of the  $\text{AlP}_3\text{O}_9$  crystal. The plot of  $(\alpha h\nu)^2$  vs  $(h\nu - E_g)$  is used to estimate the bandgap scale,  $\alpha$  originates from the Kubelka-Munk function and  $\alpha = (1 - R)^2/(2R)$ , where  $R$  is the reflectivity value,  $h\nu$  is the photon energy, and  $E_g$  is the optical bandgap.<sup>2</sup>

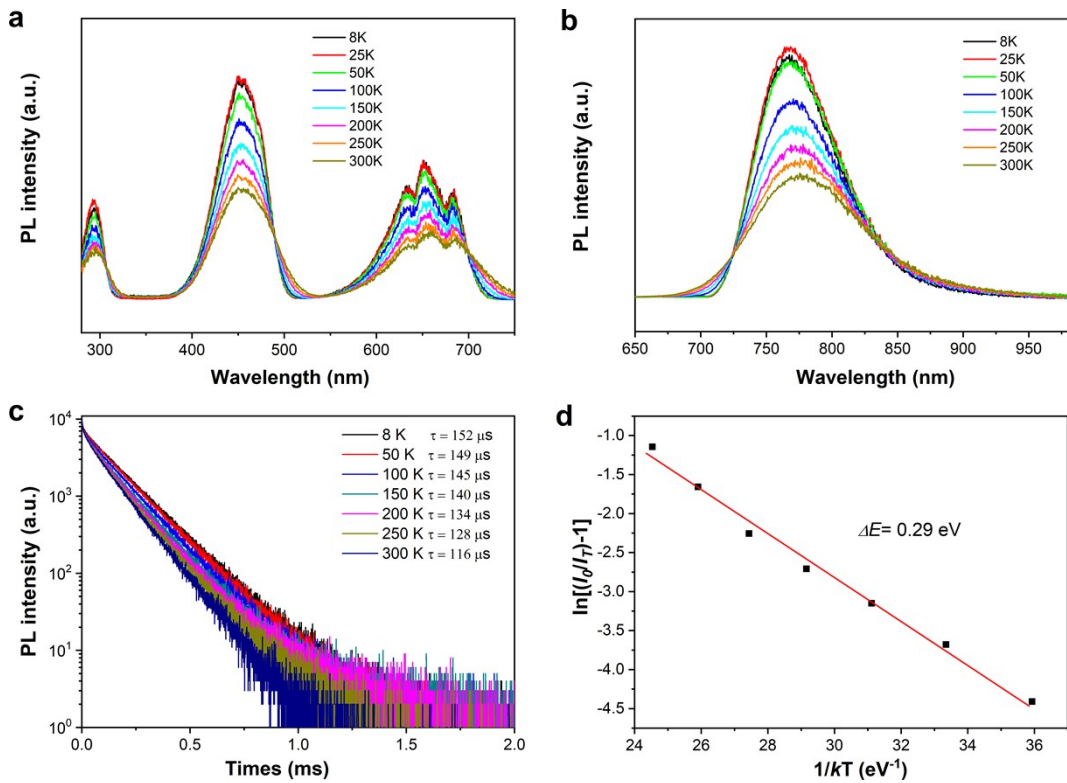

**Fig. S2.** (a) Excitation ( $\lambda_{\text{em}} = 780$  nm) and (b) emission ( $\lambda_{\text{ex}} = 450$  nm) spectra of the  $\text{AlP}_3\text{O}_9:6\%\text{Cr}^{3+}$  sample measured at 8–300 K. (c) PL decay curves of the  $\text{AlP}_3\text{O}_9:6\%\text{Cr}^{3+}$  sample measured by monitoring emission at 780 nm at 300–473 K. (d) The functional relationship of  $\ln[(I_0/I_1)-1]$  versus  $1/kT$  of  $\text{AlP}_3\text{O}_9:6\%\text{Cr}^{3+}$ .

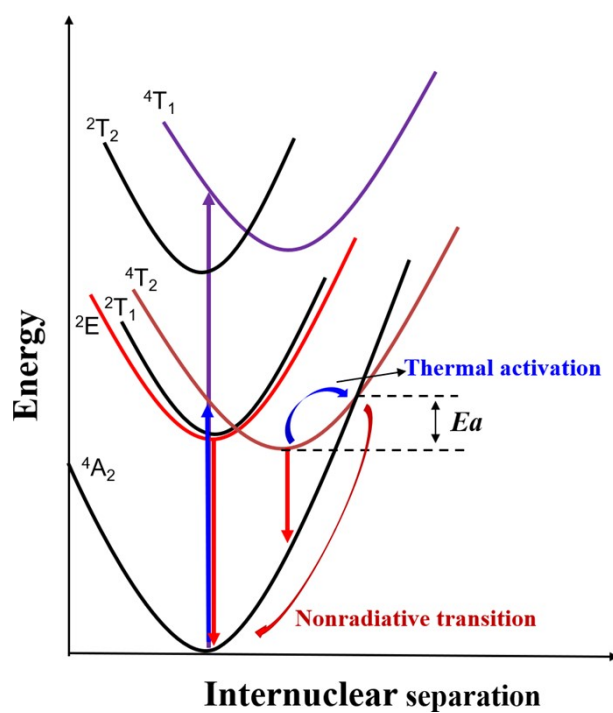

**Fig. S3** Configurational coordinate diagram of Cr<sup>3+</sup> ions in AlP<sub>3</sub>O<sub>9</sub>

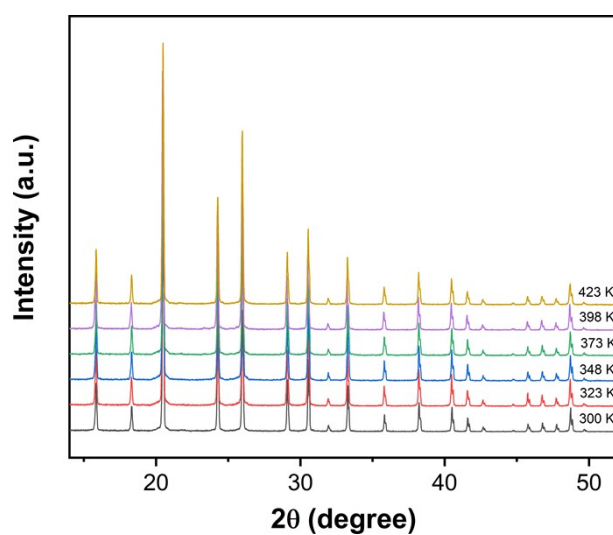

**Fig. S4.** The in-situ variable-temperature XRD patterns of the AlP<sub>3</sub>O<sub>9</sub>:6%Cr<sup>3+</sup> sample at 300–423 K.

**Table S1.** Several key optical parameters of Cr<sup>3+</sup>-activated phosphors.

|                                     |                                       |
|-------------------------------------|---------------------------------------|
| Formula                             | AlP <sub>3</sub> O <sub>9</sub> :6%Cr |
| Crystal system                      | Cubic                                 |
| Space group                         | $\bar{I}4_3d$                         |
| $a = b = c(\text{\AA})$             | 13.73(6)                              |
| $V(\text{\AA}^3)$                   | 2591.86                               |
| $\alpha = \beta = \gamma(^{\circ})$ | 90                                    |
| $R_p(\%)$                           | 8.45                                  |
| $R_{wp}(\%)$                        | 6.86                                  |
| $\chi^2$                            | 1.47                                  |

**Table S2.** The atom positions, fraction factors and thermal vibration parameters of the AlP<sub>3</sub>O<sub>9</sub>:6%Cr<sup>3+</sup> sample.

| Atom | <i>x</i>   | <i>y</i>   | <i>z</i>   | Occupancy | Uiso (*100) |
|------|------------|------------|------------|-----------|-------------|
| Al1  | 0.10560(6) | 0.10560(6) | 0.10560(6) | 0.9400    | 0.452       |
| Cr1  | 0.07132(7) | 0.07132(7) | 0.07132(7) | 0.0600    | 4.594       |
| P1   | 0.33037(3) | 0.04785(2) | 0.11910(6) | 1.0000    | 2.130       |
| O1   | 0.09114(2) | 0.10094(5) | 0.81502(4) | 1.0000    | 2.535       |
| O1   | 0.07518(1) | 0.15059(0) | 0.23271(3) | 1.0000    | 2.310       |
| O1   | 0.13658(9) | 0.05964(9) | 0.98029(3) | 1.0000    | 2.228       |

**Table S3.** Internal and external PL QY and absorption efficiency at room temperature for  $\text{AlP}_3\text{O}_9:\text{Cr}^{3+}$  samples with different  $\text{Cr}^{3+}$  doping concentrations.

| $\text{Cr}^{3+}$ (at.%) | 1  | 2  | 3  | 4  | 5  | 6  | 7  | 8  | 10 | 11 |
|-------------------------|----|----|----|----|----|----|----|----|----|----|
| IQY (%)                 | 74 | 73 | 75 | 76 | 74 | 75 | 70 | 66 | 60 | 52 |
| EQY (%)                 | 25 | 26 | 29 | 32 | 33 | 36 | 35 | 34 | 32 | 29 |
| Abs. (%)                | 34 | 36 | 39 | 42 | 45 | 48 | 50 | 51 | 54 | 56 |

**Table S4.** Several key optical parameters of  $\text{Cr}^{3+}$ -activated phosphors (Peak position > 780 nm).

| Phosphor                                                          | Emission rang (nm) | Peak position (nm) | PL IQY (%) | $I_{423\text{K}}/I_{298\text{K}}$ (%) | Ref.      |
|-------------------------------------------------------------------|--------------------|--------------------|------------|---------------------------------------|-----------|
| $\text{AlP}_3\text{O}_9:\text{Cr}^{3+}$                           | 650-1000           | 780                | 76         | 91                                    | This work |
| $\text{ScBO}_3:\text{Cr}^{3+}$                                    | 680-1000           | 780                | 72         | ~50                                   | 3, 4      |
| $\text{Li}_2\text{MgZrO}_4:\text{Cr}^{3+}$                        | 650-1200           | 805                | 56         | 30                                    | 5         |
| $\text{Ga}_{2-x}\text{In}(\text{Sc})_x\text{O}_3:\text{Cr}^{3+}$  | 650-1100           | 800                | 88-99      | 77                                    | 6, 7      |
| $\text{Sr}_9\text{M}_{1-x}(\text{PO}_4)_7:\text{Cr}^{3+}$         | 700-1100           | 850                | 74         | 15                                    | 8         |
| $\text{GaTaO}_4:\text{Cr}^{3+}$                                   | 700-1100           | 825                | 57         | 50                                    | 9         |
| $\text{ScF}_6:\text{Cr}^{3+}$                                     | 700-1100           | 853                | 45         | 86                                    | 10        |
| $\text{LiInSi}_2\text{O}_6:\text{Cr}^{3+}$                        | 700-1100           | 840                | 75         | 77                                    | 11        |
| $\text{LiIn}_2\text{SbO}_6:\text{Cr}^{3+}$                        | 700-1300           | 960                | 7          | ~8                                    | 12, 13    |
| $\text{LiIn}_2\text{GeO}_6:\text{Cr}^{3+}$                        | 700-1200           | 880                | 81         | ~25                                   | 14        |
| $\text{LiGaP}_2\text{O}_7:\text{Cr}^{3+}$                         | 700-1200           | 846                | ~47        | ~15                                   | 15        |
| $\text{LiScP}_2\text{O}_7:\text{Cr}^{3+}$                         | 750-1100           | 880                | 74         | 20                                    | 16        |
| $\text{NaScGe}_2\text{O}_6:\text{Cr}^{3+}$                        | 700-1300           | 895                | 40         | ~50                                   | 17        |
| $\text{Mg}_2\text{GeO}_4:\text{Cr}^{3+}$                          | 700-1100           | 900                | ~48        | ~20                                   | 18        |
| $\text{LaSc}_2\text{B}_4\text{O}_{12}:\text{Cr}^{3+}$             | 700-1150           | 870                | 52         | ~55                                   | 19        |
| $\text{Cs}_2\text{AgInCl}_6:\text{Cr}^{3+}$                       | 800-1400           | 1010               | ~22        | ~10                                   | 20        |
| $\text{Ca}_3\text{Hf}_2\text{Al}_2\text{SiO}_{12}:\text{Cr}^{3+}$ | 650-1100           | 785                | ~75        | ~40                                   | 21        |
| $\text{La}_3\text{Ga}_5\text{GeO}_{14}:\text{Cr}^{3+}$            | 700-1300           | 850                | 35         | ~60                                   | 22, 23    |
| $\text{La}_2\text{MgZrO}_6:\text{Cr}^{3+}$                        | 650-1200           | 825                | ~58        | ~30                                   | 24        |
| $\text{BaZrGe}_3\text{O}_9:\text{Cr}^{3+}$                        | 650-1200           | 830                | -          | 53                                    | 25        |

**Table S5.** Interatomic distances and bond angles for  $\text{AlP}_3\text{O}_9:6\%\text{Cr}^{3+}$  samples at 300 K and 423 K.

| Distances (Å) | 300 K    | 423 K    | Variation ratio (%) | Bond angle (°) | 300 K     | 423 K     | Variation ratio (%) |
|---------------|----------|----------|---------------------|----------------|-----------|-----------|---------------------|
| Al1-O2        | 1.812(7) | 1.818(1) | 0.29                | O2-Al1-O2      | 88.56(6)  | 88.91(2)  | 0.39                |
| Al1-O3        | 1.801(5) | 1.807(4) | 0.32                | O3-Al1-O3      | 88.62(4)  | 88.95(2)  | 0.37                |
| Cr1-O2        | 1.899(2) | 1.904(8) | 0.29                | O2-Cr1-O2      | 90.91(3)  | 91.19(7)  | 0.31                |
| Cr1-O3        | 1.882(6) | 1.888(2) | 0.30                | O3-Cr1-O3      | 91.92(1)  | 92.24(5)  | 0.35                |
| P1-O1         | 1.611(7) | 1.612(7) | 0.06                | Al1-O2-P1      | 158.71(3) | 162.65(6) | 2.48                |
| P1-O2         | 1.585(4) | 1.587(4) | 0.12                | Al1-O3-P1      | 172.13(4) | 166.84(3) | -3.07               |
| P1-O3         | 1.448(5) | 1.450(5) | 0.14                | O1-P1-O1       | 103.57(3) | 103.60(6) | 0.03                |
| Al1-(O2)-P1   | 3.124(1) | 3.324(8) | 6.45                | O1-P1-O2       | 104.86(2) | 104.89(5) | 0.03                |
| Al1-(O3)-P1   | 3.421(5) | 3.021(2) | -11.70              | O1-P1-O3       | 108.65(2) | 108.88(1) | 0.02                |

## References

- 1 B. Henderson and G. F. Imbusch, *Optical spectroscopy of inorganic solids*, Oxford University Press, 2006.
- 2 J. H. Nobbs, Kubelka-Munk Theory and the Prediction of Reflectance, *Coloration Technology*, 1985, **15**, 66-75.
- 3 M. H. Fang, P. Y. Huang, Z. Bao, N. Majewska, T. Leśniewski, S. Mahlik, M. Grinberg, G. Leniec, S. M. Kaczmarek, C. W. Yang, K. M. Lu, H. S. Sheu and R. S. Liu, Penetrating Biological Tissue Using Light-Emitting Diodes with a Highly Efficient Near-Infrared  $\text{ScBO}_3:\text{Cr}^{3+}$  Phosphor, *Chem. Mater.*, 2020, **32**, 2166-2171.
- 4 H. D. Qiyue Shao, Leqi Yao, Junfeng Xu, Chao Liang and Jianqing Jiang, Photoluminescence properties of a  $\text{ScBO}_3:\text{Cr}^{3+}$  phosphor and its applications for broadband nearinfrared LEDs., *RSC Advances*, 2018, **8**, 12035-12042.
- 5 Y. Zhou, S. Yi, Z. Fang, J. Lu, Z. Hu, W. Zhao and Y. Wang, Research on a new type of near-infrared phosphor  $\text{Li}_2\text{MgZrO}_4:\text{Cr}^{3+}$ -synthesis, crystal structure, photoluminescence and thermal stability, *Opt. Mater.*, 2021, **117**, 111209.
- 6 J. Zhong, Y. Zhuo, F. Du, H. Zhang, W. Zhao and J. Brgoch, Efficient and Tunable Luminescence in  $\text{Ga}_{2-x}\text{In}_x\text{O}_3:\text{Cr}^{3+}$  for Near-Infrared Imaging, *ACS Appl. Mater. Interfaces*, 2021, **13**, 31835-31842.
- 7 M.-H. Fang, K.-C. Chen, N. Majewska, T. Leśniewski, S. Mahlik, G. Leniec, S. M. Kaczmarek, C.-W. Yang, K.-M. Lu, H.-S. Sheu and R.-S. Liu, Hidden Structural Evolution and Bond Valence Control in Near-Infrared Phosphors for Light-Emitting Diodes, *ACS Energy Lett.*, 2021, **6**, 109-114.

- 8 F. Zhao, H. Cai, Z. Song and Q. Liu, Structural Confinement for Cr<sup>3+</sup> Activators toward Efficient Near-Infrared Phosphors with Suppressed Concentration Quenching, *Chem. Mater.*, 2021, **33**, 3621-3630.
- 9 Q. Zhang, D. Liu, P. Dang, H. Lian, G. Li and J. Lin, Two Selective Sites Control of Cr<sup>3+</sup>-Doped ABO<sub>4</sub> Phosphors for Tuning Ultra-Broadband Near-Infrared Photoluminescence and Multi-Applications, *Laser Photonics Rev.*, 2021, **8**, 2100459.
- 10 Q. Lin, Q. Wang, M. Liao, M. Xiong, X. Feng, X. Zhang, H. Dong, D. Zhu, F. Wu and Z. Mu, Trivalent Chromium Ions Doped Fluorides with Both Broad Emission Bandwidth and Excellent Luminescence Thermal Stability, *ACS Appl. Mater. Interfaces*, 2021, **13**, 18274-18282.
- 11 X. Xu, Q. Shao, L. Yao, Y. Dong and J. Jiang, Highly efficient and thermally stable Cr<sup>3+</sup>-activated silicate phosphors for broadband near-infrared LED applications, *Chem. Eng. J.*, 2020, **383**, 123108.
- 12 D. Liu, G. Li, P. Dang, Q. Zhang, Y. Wei, H. Lian, M. Shang, C. C. Lin and J. Lin, Simultaneous Broadening and Enhancement of Cr<sup>3+</sup> Photoluminescence in LiIn<sub>2</sub>SbO<sub>6</sub> by Chemical Unit Cosubstitution: Night-Vision and Near-Infrared Spectroscopy Detection Applications, *Angew. Chem. Int. Ed. Engl.*, 2021, 202103612.
- 13 G. Liu, T. Hu, M. S. Molokeev and Z. Xia, Li/Na substitution and Yb<sup>3+</sup> co-doping enabling tunable near-infrared emission in LiIn<sub>2</sub>SbO<sub>6</sub>:Cr<sup>3+</sup> phosphors for light-emitting diodes, *iScience*, 2021, **24**, 102250.
- 14 T. Liu, H. Cai, N. Mao, Z. Song and Q. Liu, Efficient near-infrared pyroxene phosphor LiInGe<sub>2</sub>O<sub>6</sub>:Cr<sup>3+</sup> for NIR spectroscopy application, *J. Am. Ceram. Soc.*, 2021, 17856.
- 15 Z. L. Peng Sun, Zhaohua Luo, Rui Dong, and Jun Jiang, Efficient and Broadband LiGaP<sub>2</sub>O<sub>7</sub>:Cr<sup>3+</sup> Phosphors for Smart Near-Infrared Light-Emitting Diodes, *Laser Photonics Rev.*, 2021, **15**, 202100227.
- 16 Q. S. Leqi Yao, Shouyu Han, Chao Liang, Jinhua He, and Jianqing Jiang, Enhancing Near-Infrared Photoluminescence Intensity and Spectral Properties in Yb<sup>3+</sup> Codoped LiScP<sub>2</sub>O<sub>7</sub>:Cr<sup>3+</sup>, *Chem. Mater.*, 2020, **32**, 2430-2439.
- 17 S. Miao, Y. Liang, Y. Zhang, D. Chen and X. J. Wang, Broadband Short-Wave Infrared Light-Emitting Diodes Based on Cr<sup>3+</sup>-Doped LiScGeO<sub>4</sub> Phosphor, *ACS Appl. Mater. Interfaces*, 2021, **13**, 36011-36019.
- 18 H. Cai, S. Liu, Z. Song and Q. Liu, Tuning luminescence from NIR-I to NIR-II in Cr<sup>3+</sup>-doped olivine phosphors for nondestructive analysis, *J. Mater. Chem. C*, 2021, **9**, 5469-5477.
- 19 T. Gao, W. Zhuang, R. Liu, Y. Liu, C. Yan and X. Chen, Design of a Broadband NIR Phosphor for Security-Monitoring LEDs: Tunable Photoluminescence Properties and Enhanced Thermal Stability, *Cryst. Growth Des.*, 2020, **20**, 3851-3860.
- 20 F. Zhao, Z. Song, J. Zhao and Q. Liu, Double perovskite Cs<sub>2</sub>AgInCl<sub>6</sub>:Cr<sup>3+</sup>: broadband and near-infrared luminescent materials, *Inorg. Chem. Front.*, 2019, **6**, 3621-3628.
- 21 L. Zhang, D. Wang, Z. Hao, X. Zhang, G. h. Pan, H. Wu and J. Zhang, Cr<sup>3+</sup>-Doped Broadband NIR Garnet Phosphor with Enhanced Luminescence and its Application in NIR Spectroscopy, *Adv. Optical Mater.*, 2019, **7**, 1900185.
- 22 V. Rajendran, M. H. Fang, G. N. D. Guzman, T. Lesniewski, S. Mahlik, M. Grinberg, G. Leniec, S. M. Kaczmarek, Y. S. Lin, K. M. Lu, C.-M. Lin, H. Chang, S. F. Hu and R. S. Liu, Super Broadband Near-Infrared Phosphors with High Radiant Flux as Future Light Sources for Spectroscopy Applications, *ACS Energy Lett.*, 2018, **3**, 2679-2684.
- 23 T. Gao, W. Zhuang, R. Liu, Y. Liu, C. Yan, J. Tian, G. Chen, X. Chen, Y. Zheng and L. Wang, Site occupancy and enhanced luminescence of broadband NIR gallogermanate phosphors by energy transfer, *J. Am. Ceram. Soc.*, 2020, **103**, 202-213.
- 24 H. Zeng, T. Zhou, L. Wang and R. J. Xie, Two-Site Occupation for Exploring Ultra-Broadband Near-Infrared Phosphor—Double-Perovskite La<sub>2</sub>MgZrO<sub>6</sub>:Cr<sup>3+</sup>, *Chem. Mater.*, 2019, **31**, 5245-5253.
- 25 D. Hou, H. Lin, Y. Zhang, J.-Y. Li, H. Li, J. Dong, Z. Lin and R. Huang, A broadband near-infrared phosphor BaZrGe<sub>3</sub>O<sub>9</sub>:Cr<sup>3+</sup>: luminescence and application for light-emitting diodes, *Inorg. Chem. Front.*, 2021, **8**, 2333-2340.
